# Supplementary material for: The dual function of PRMT1 in modulating epithelial-mesenchymal transition and cellular senescence in breast cancer cells through regulation of ZEB1
Source: Sci Rep. 2016 Jan 27;6:19874. doi: 10.1038/srep19874 (PMC4728496; doi:10.1038/srep19874)
Supplement: Supplementary Information [file srep19874-s1.pdf]

## Supplemental Information

### The dual function of PRMT1 in modulating epithelial-mesenchymal transition and cellular senescence in breast cancer cells through regulation of ZEB1

Yanyan Gao, Yaping Zhao, Juechao Zhang, Yang Lu, Xin Liu, Pengyu Geng,  
Baiqu Huang, Yu Zhang & Jun Lu

#### Supplementary Figure S1

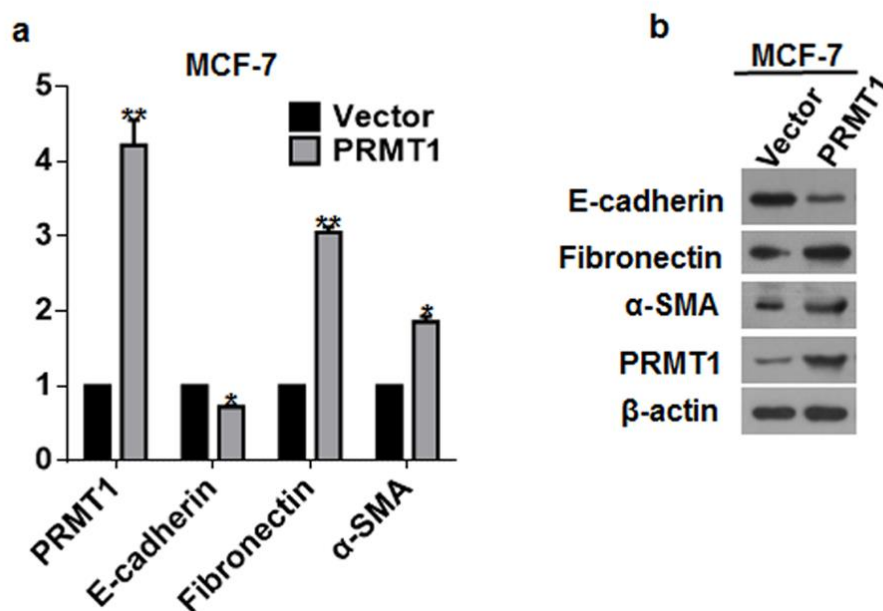

Supplementary Figure S1. Changes in mRNA and protein levels of the EMT marker genes upon ectopic expression of PRMT1 in MCF7 cells. a.

The mRNA levels of PRMT1, E-cadherin, fibronectin and  $\alpha$ -SMA were

assessed by real-time PCR in MCF7-PRMT1 cells. **b.** Western blots of the expression of PRMT1, E-cadherin, fibronectin and  $\alpha$ -SMA in MCF7-PRMT1 cells. Error bars, mean  $\pm$  SD, \*  $P < 0.05$ , \*\*  $P < 0.01$ .

## Supplementary Figure S2

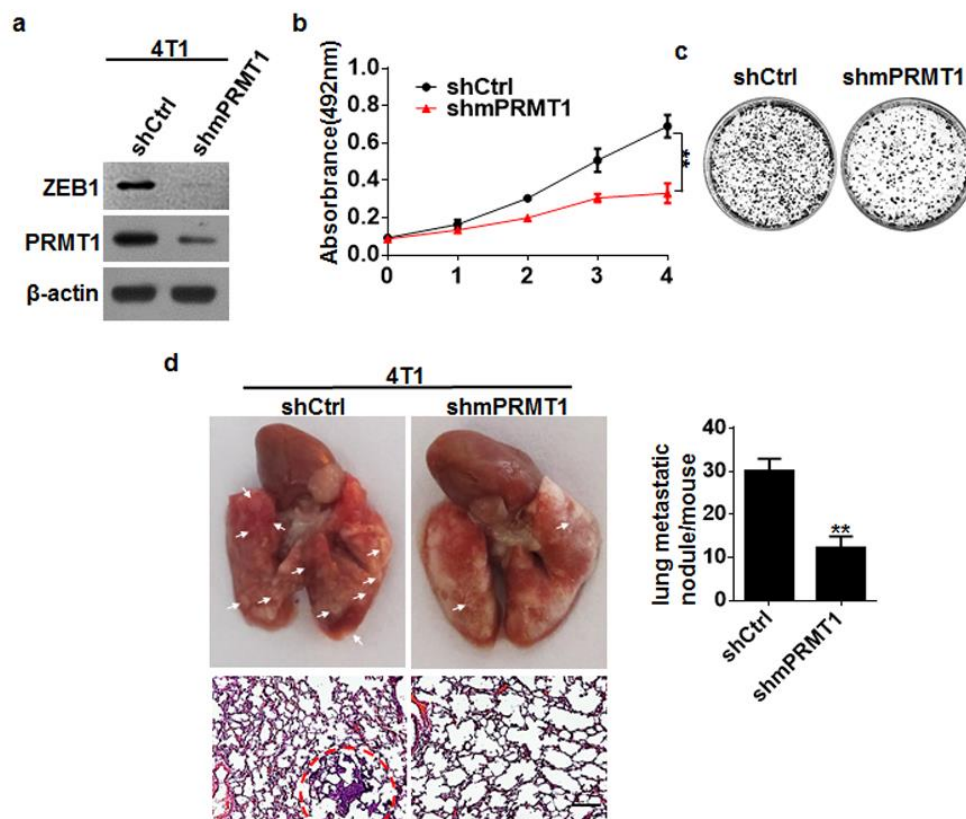

**Supplementary Figure S2. PRMT1 knockdown on murine breast adenocarcinoma 4T1 cells inhibited cell proliferation, ZEB1 expression and the distant metastasis in the *in vivo* female BALB/c mice.** **a.** Western blotting of mouse PRMT1 knockdown efficiency in 4T1-shmPRMT1, and expression level of ZEB1. **b.** MTT assay was used to assess the effect of PRMT1 knockdown on 4T1 cell growth at different time points as indicated.

Data are the mean  $\pm$  SD based on five replicates per experiment. **c.** Cell proliferation was examined by colony formation assays in 4T1-shmPRMT1 and shCtrl cells. **d.** 4T1-shmPRMT1 cells and 4T1-shCtrl cells were subcutaneously injected into BALB/c female mice (n=6, for each experimental group), and 2 weeks later, mice were sacrificed, visible lung metastatic nodules per mouse were counted and are represented in the graph. Representative H&E stained lung sections are displayed in the lower panel. Scale bars: 100 $\mu$ m. Error bars, mean  $\pm$  SD, \*\* P<0.01.

### Supplementary Figure S3

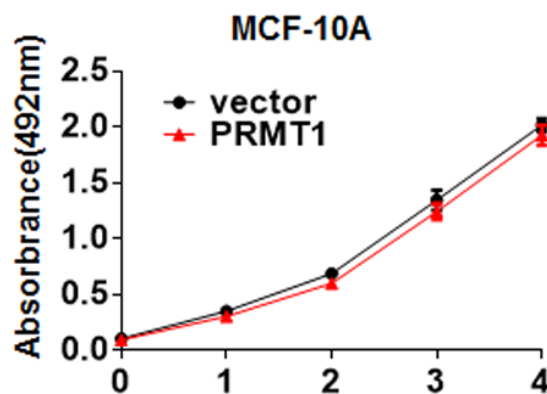

**Supplementary Figure S3. Effects of PRMT1 overexpression on cell proliferation in MCF10A cells.** MTT assay was used to assess the effect of PRMT1 overexpression on MCF10A cell growth at different time points as indicated. Data are the mean  $\pm$  SD based on five replicates per experiment.

## Supplementary Figure S4

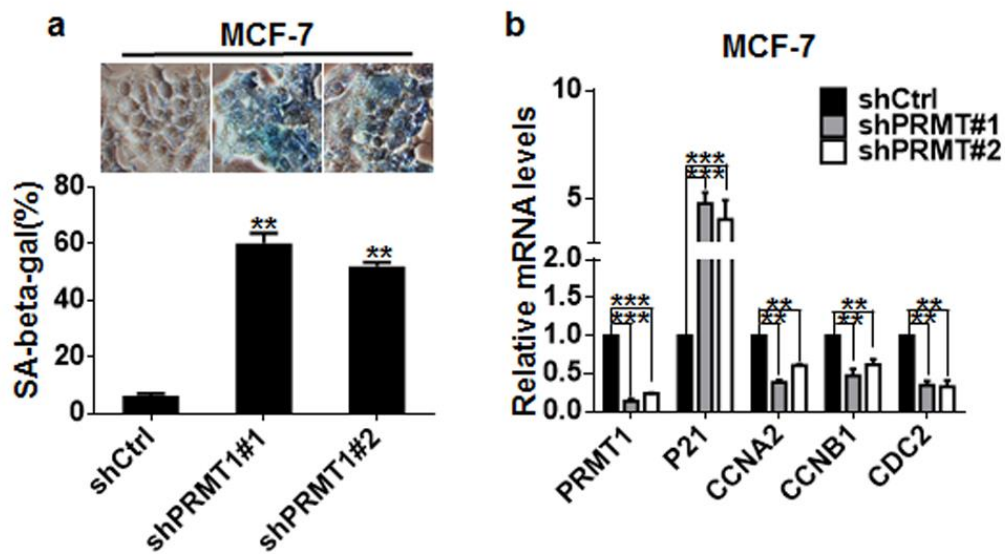

## Supplementary Figure S4. PRMT1 knockdown induced cellular

**senescence in MCF7 cells.** **a.** SA- $\beta$ -Gal assay was used to determine the percentage of the senescent population in MCF7-shPRMT1#1/#2 and shCtrl cells (lower). Top panel shows the images of SA- $\beta$ -Gal staining. **b.** Expression of p21 and G2/M-associated proteins was analyzed by qRT-PCR. All experiments were repeated at least three times. Error bars, mean  $\pm$  SD, \*\* $P$ <0.01, \*\*\* $P$ <0.001.

## Supplementary Table S1

| Cloning Primers sequences |                                                                  |
|---------------------------|------------------------------------------------------------------|
| shCtrl S                  | GATCCCCTTCTCCGAACGTGTCACGTTTCAAGA<br>GAACGTGACACGTTCCGAGAATTTTTC |
| shCtrl AS                 | TCGAGAAAAATTCTCCGAACGTGTCACGTTCTC                                |

|                              |                                                                                |
|------------------------------|--------------------------------------------------------------------------------|
|                              | TTGAAACGTGACACGTTCCGGAGAAGGG                                                   |
| shPRMT1#1 S                  | GATCCCC <u>AGATTACTACTTTGACTCCTT</u> CAAGA<br>GAGGAGTCAAAGTAGTAATCTTTTTTC      |
| shPRMT1#1 AS                 | TCGAGAAAAA <u>AGATTACTACTTTGACTCCT</u> CTCT<br>TGAAGGAGTCAAAGTAGTAATCTGGG      |
| shPRMT1#2 S                  | GATCCCC <u>GCGAGGAGATCTTCGGCACCATT</u> CA<br>AGAGATGGTGCCGAAGATCTCCTCGCTTTTTTC |
| shPRMT1#2 AS                 | TCGAGAAAAAGCGAGGAGATCTTCGGCACCAT<br>CTCTTGAATGGTGCCGAAGATCTCCTCGCGGG           |
| shPRMT1#3 S                  | GATCCCC <u>GGACATGACATCCAAAGACTT</u> CAAGA<br>GAGTCTTTGGATGTCATGTCCTTTTTTC     |
| shPRMT1#3 AS                 | TCGAGAAAAAGGACATGACATCCAAAGACTCTC<br>TTGAAGTCTTTGGATGTCATGTCCGGG               |
| shZEB1#1 S                   | GATCCCC <u>GCTCACACATAAGCAGTAAGATT</u> CAA<br>GAGATCTTACTGCTTATGTGTGAGCTTTTTTC |
| shZEB1#1 AS                  | TCGAGAAAAAGCTCACACATAAGCAGTAAGATC<br>TCTTGAATCTTACTGCTTATGTGTGAGCGGG           |
| shZEB1#2 S                   | GATCCCC <u>GCAACAGGGAGAATTATTAGATT</u> CAA<br>GAGATCTAATAATTCTCCCTGTTGCTTTTTTC |
| shZEB1#2 AS                  | TCGAGAAAAAGCAACAGGGAGAATTATTAGATC<br>TCTTGAATCTAATAATTCTCCCTGTTGCGGG           |
| <b>PCR primers sequences</b> |                                                                                |

|                   |                           |
|-------------------|---------------------------|
| β-actin Forward   | GAGCACAGAGCCTCGCCTTT      |
| β-actin Reverse   | ATCCTTCTGACCCATGCCCA      |
| PRMT1 Forward     | GATGCTGAAGGACGAGGTGC      |
| PRMT1 Reverse     | ACTCGATCCCGATGACCTTGCG    |
| FN Forward        | CAGTGGGAGACCTCGAGAAG      |
| FN Reverse        | TCCCTCGGAACATCAGAAAC      |
| α-SMA Forward     | CGTGTTGCCCTGAAGAGCAT      |
| α-SMA Reverse     | ACCGCCTGGATAGCCACATACA    |
| E-cad Forward     | GACAACAAGCCCGAATT         |
| E-cad Reverse     | GGAAACTCTCTCGGTCCA        |
| β-cat Forward     | AAAATGGCAGTGCGTTTAG       |
| β-cat Reverse     | TTTGAAGGCAGTCTGTCGTA      |
| Cyclin A2 Forward | CATTGGTCCCTCTTGATTATCC    |
| Cyclin A2 Reverse | CACTCACTGGCTTTTCATCTTC    |
| Cyclin B1 Forward | AAGAGCTTTAACTTTGGTCTGGG   |
| Cyclin B1 Reverse | CTTTGTAAGTCCTTGATTTACCATG |
| cdc2 Forward      | TGGGGTCAGCTCGTTACTCA      |
| cdc2 Reverse      | CACTTCTGGCCACACTTCATT     |
| p21 Forward       | GGATGTCCGTCAGAACCC        |
| p21 Reverse       | GCTCCCAGGCGAAGTCA         |
| Snail Forward     | GCAAATACTGCAACAAGG        |
| Snail Reverse     | GCACTGGTACTTCTTGACA       |

|               |                      |
|---------------|----------------------|
| Slug Forward  | AGATGCATATTCGGACCCAC |
| Slug Reverse  | CCTCATGTTTGTGCAGGAGA |
| Twist Forward | GGAGTCCGCAGTCTTACGAG |
| Twist Reverse | TCTGGAGGACCTGGTAGAGG |
| ZEB1 Forward  | TGCACTGAGTGTGGAAAAGC |
| ZEB1 Reverse  | TGGTGATGCTGAAAGAGACG |
